# Supplementary material
Source: PubMed Central journal article supplement (PMC5103021)
Supplement: mmc1.pdf [file mmc1.pdf]

**Biophysical Journal, Volume 111**

**Supplemental Information**

**Kinetic Insights into the Binding between the nSH3 Domain of CrkII and  
Proline-Rich Motifs in cAbl**

**Danyun Zeng, Veer S. Bhatt, Qingliang Shen, and Jae-Hyun Cho**

## Supporting Material

**Table S1.** The results of CPMG-RD data fitting of individual residues.

| Residues | $k_{ex} (s^{-1})$  |                    |                    |
|----------|--------------------|--------------------|--------------------|
|          | PRM <sup>524</sup> | PRM <sup>568</sup> | PRM <sup>758</sup> |
| 146      | 386.7 ± 44.2       | 706.0 ± 31.3       | 1132.3 ± 54.5      |
| 147      | 362.3 ± 74.2       | 790.7 ± 62.7       | 875.7 ± 168.7      |
| 148      | 401.3 ± 32.9       | 742.4 ± 24.1       | 1157.5 ± 42.5      |
| 149      | 311.4 ± 98.9       | 597.8 ± 22.7       | 804.2 ± 37.8       |
| 150      | 349.1 ± 44.6       | 746.3 ± 25.7       | 888.8 ± 35.9       |
| 163      | - <sup>a</sup>     | - <sup>a</sup>     | 985.3 ± 126.1      |
| 164      | - <sup>a</sup>     | - <sup>a</sup>     | 1097.8 ± 94.4      |
| 166      | 412.2 ± 41.3       | 742.7 ± 35.7       | 1141.1 ± 88.5      |
| 169      | 385.1 ± 56.2       | 784.2 ± 36.5       | 832.8 ± 40.4       |
| 181      | - <sup>a</sup>     | 806.3 ± 176.2      | - <sup>a</sup>     |
| 186      | - <sup>a</sup>     | - <sup>a</sup>     | 1128.9 ± 76.9      |

<sup>a</sup> These are not analyzed because either no-dispersion was observed or peaks overlap with other peaks.

**Table S2.** Individual  $^{15}\text{N}$  CPMG-RD data fitting results of binding between nSH3 and PRM<sup>758</sup> at different temperatures.

| Residues   | $k_{\text{ex}}$ ( $\text{s}^{-1}$ ) <sup>a</sup> |               |                |                |                |
|------------|--------------------------------------------------|---------------|----------------|----------------|----------------|
|            | 15 °C                                            | 20 °C         | 30 °C          | 35 °C          | 40 °C          |
| 146        | 370.5 ± 65.8                                     | 843.0 ± 82.0  | - <sup>b</sup> | 2347 ± 390     | - <sup>b</sup> |
| 147        | - <sup>b</sup>                                   | 611.1 ± 45.6  | 1848 ± 529     | - <sup>b</sup> | - <sup>b</sup> |
| 148        | 397.0 ± 66.9                                     | 634.2 ± 28.7  | 1844 ± 109     | - <sup>b</sup> | - <sup>b</sup> |
| 149        | 465.0 ± 28.2                                     | 740.2 ± 46.5  | 1510 ± 100     | 2918 ± 113     | 4434.0 ± 337   |
| 150        | 532.0 ± 50.6                                     | 780.9 ± 44.9  | 1719 ± 85      | 2912 ± 99      | 4677.1 ± 313   |
| 164        | - <sup>b</sup>                                   | 615.8 ± 43.1  | 1697 ± 340     | - <sup>b</sup> | - <sup>b</sup> |
| 166        | 270.4 ± 41.8                                     | 811.7 ± 140.8 | 1760 ± 106     | 2645 ± 258     | 4424.6 ± 1087  |
| 169        | 531.6 ± 61.2                                     | 740.9 ± 65.2  | 1600 ± 123     | 2895 ± 111     | 4487.5 ± 332   |
| 186        | 314.9 ± 42.9                                     | 751.1 ± 30.2  | 1733 ± 182     | 2196 ± 352     | - <sup>b</sup> |
| Global fit | 393 ± 86.8                                       | 681 ± 57.9    | 1728 ± 76.5    | 2651 ± 315     | 4883 ± 80.7    |

<sup>a</sup> Data obtained at 25 °C are shown in Table S1.

<sup>b</sup> Data were not analyzed because of either peak overlap or absence or small  $R_{\text{ex}}$ .

Figure 1

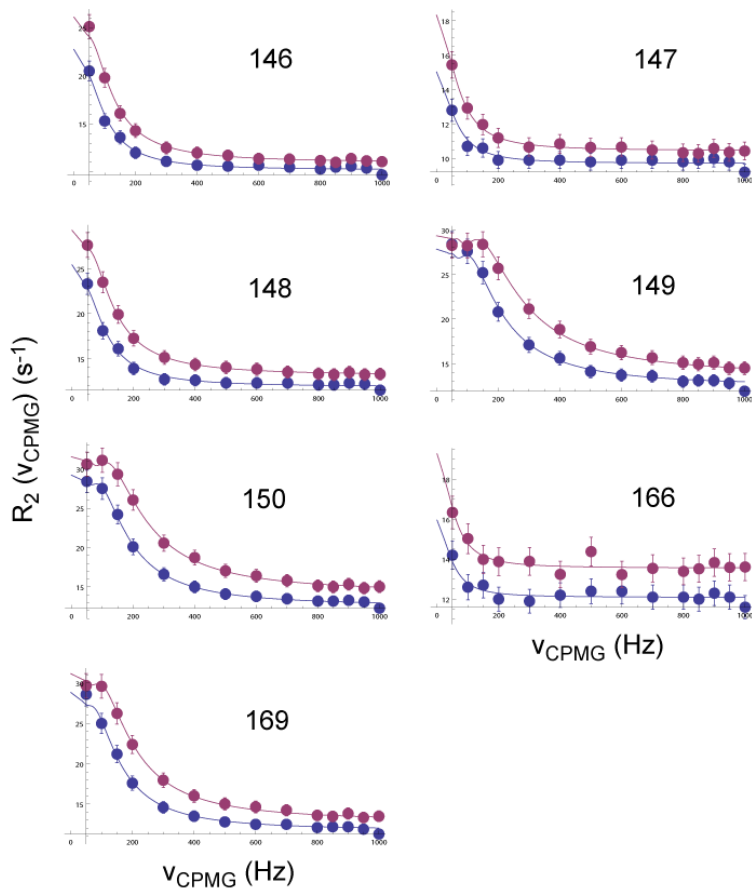

**Figure S1a.**  $^{15}\text{N}$  CPMG-RD profiles of the nSH3 domain, which is mixed with PRM<sup>524</sup>. Based on the  $K_d$ , the population of the nSH3:PRM<sup>524</sup> complex is estimated to be ~5 % of the entire population of nSH3 domain. The residue numbers are shown in each figure. The blue and red circles represent the data acquired at 14.1 T and 18.8 T, respectively. The solid lines represent the best fit to the individual residues. The results of individual fit ( $k_{\text{ex}}$  values) are shown in Table S1.

Figure S1 continued

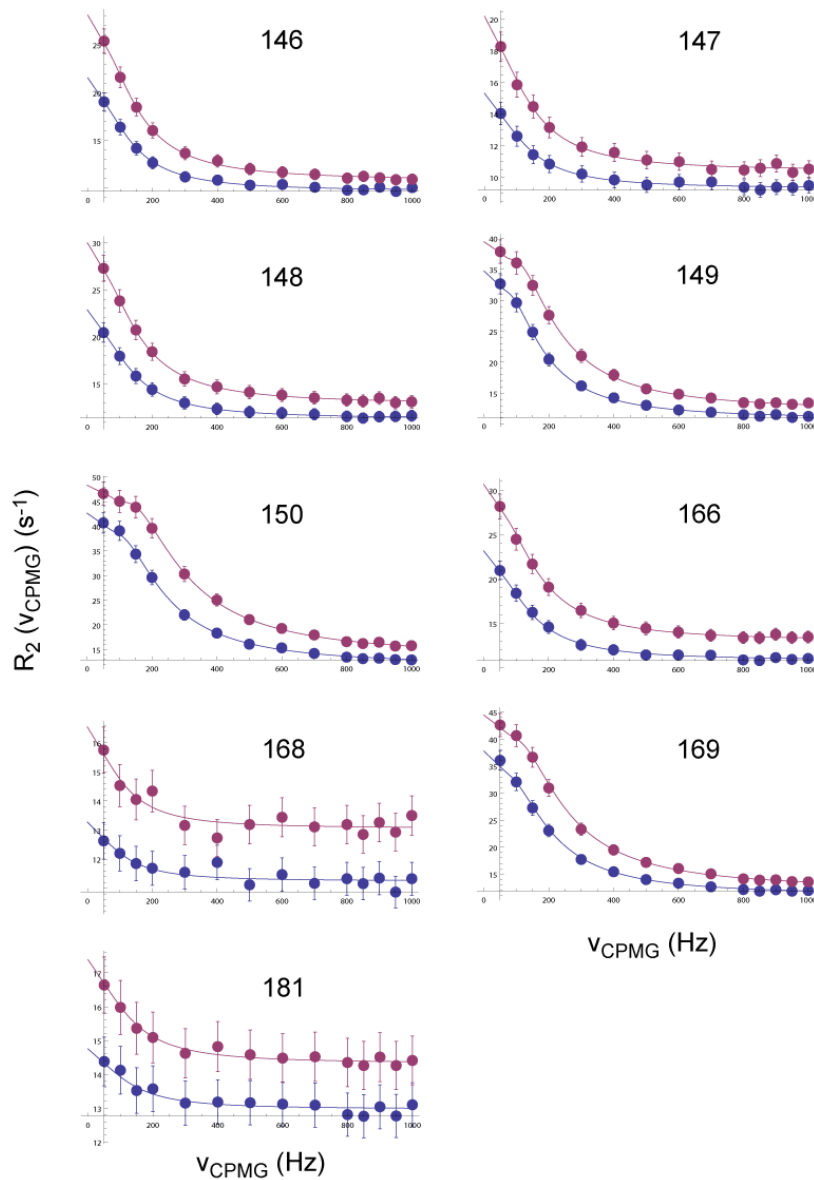

**Figure S1b.**  $^{15}\text{N}$  CPMG-RD profiles of the nSH3 domain, which is mixed with PRM<sup>568</sup>. Based on the  $K_d$ , the population of the nSH3:PRM<sup>568</sup> complex is estimated to be ~5 % of the entire population of nSH3 domain. The residue numbers are shown in each figure. The blue and red circles represent the data acquired at 14.1 T and 18.8 T, respectively. The solid lines represent the best fit to the individual residues. The results of individual fit ( $k_{\text{ex}}$  values) are shown in Table S1.

Figure S1 continued

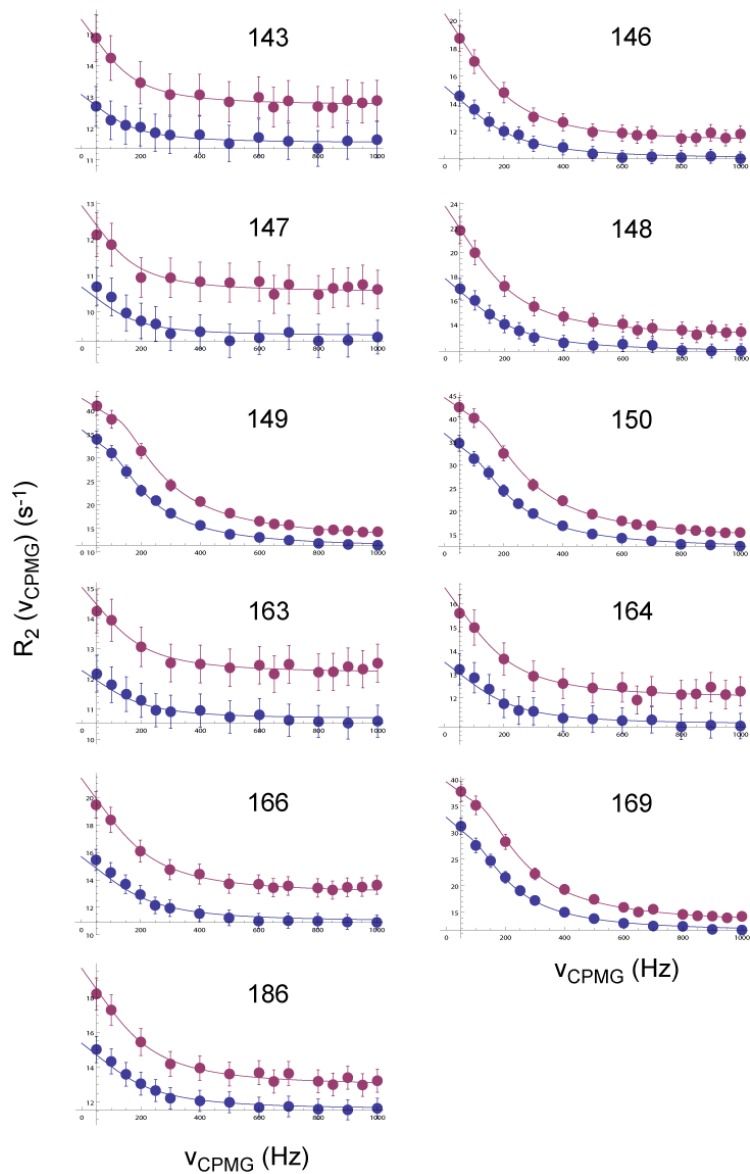

**Figure S1c.**  $^{15}\text{N}$  CPMG-RD profiles of the nSH3 domain, which is mixed with PRM<sup>758</sup>. Based on the Kd, the population of the nSH3:PRM<sup>758</sup> complex is estimated to be ~5 % of the entire population of nSH3 domain. The residue numbers are shown in each figure. The blue and red circles represent the data acquired at 14.1 T and 18.8 T, respectively. The solid lines represent the best fit to the individual residues. The results of individual fit ( $k_{\text{ex}}$  values) are shown in Table S1.

Figure S2

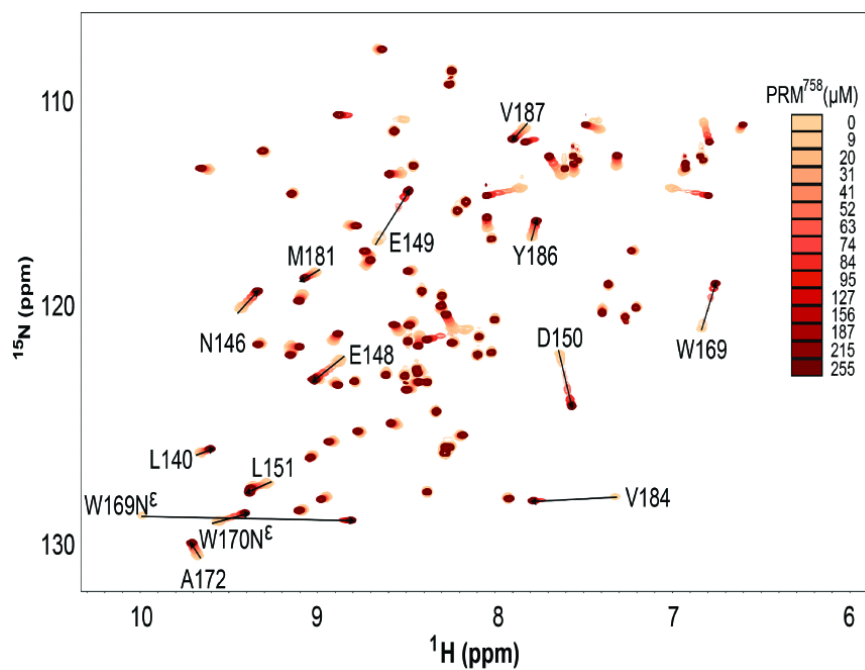

**Figure S2.** The NMR titration result showing the binding between the nSH3 domain and  $\text{PRM}^{758}$ . The gradual changes of peaks indicate that the binding process occurs in the intermediate – fast NMR timescales.

Figure S3

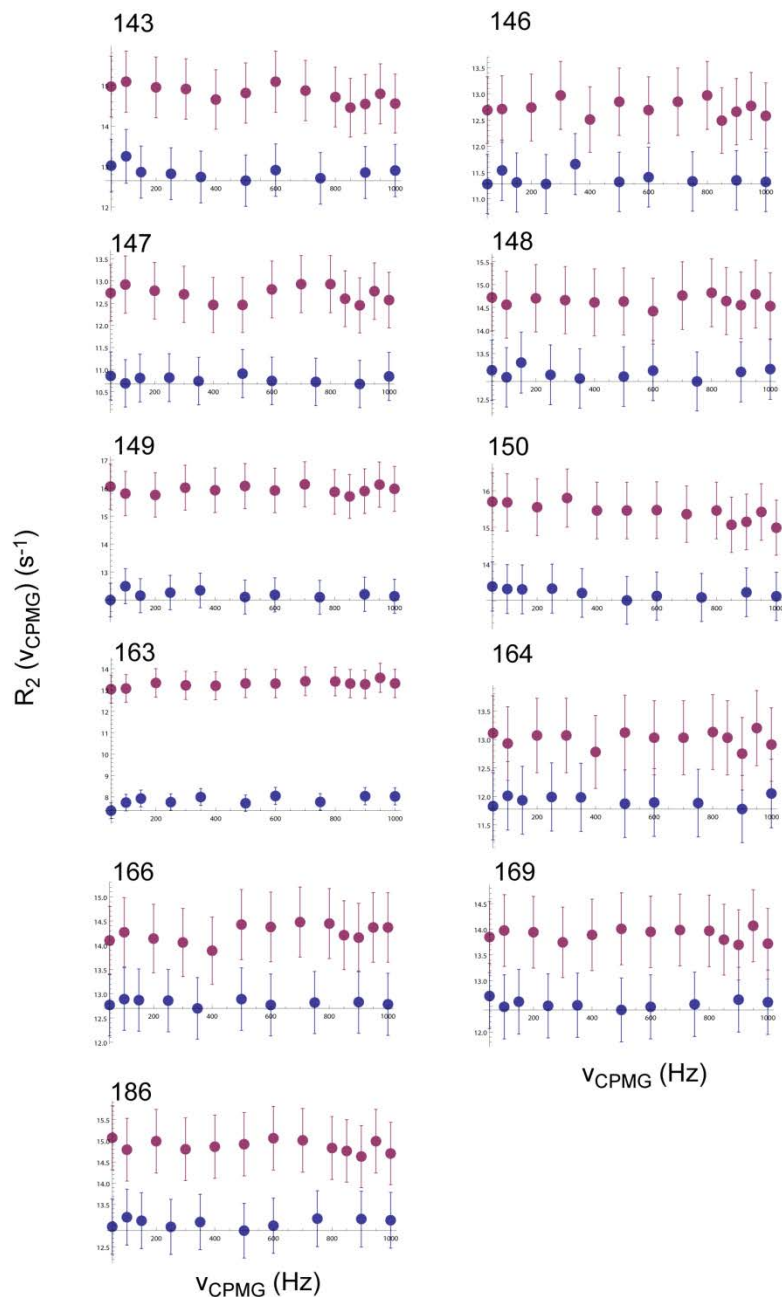

**Figure S3.** The  $^{15}\text{N}$  CPMG-RD profiles of the peaks that were included in the analysis of binding between nSH3 domain and PRMs. The residue numbers are shown on top of each panel. The blue and red circles represent the CPMG-RD data for the free and PRM-saturated nSH3 domains, respectively. For clarity, only the data obtained at 800MHz are shown.



Figure S4

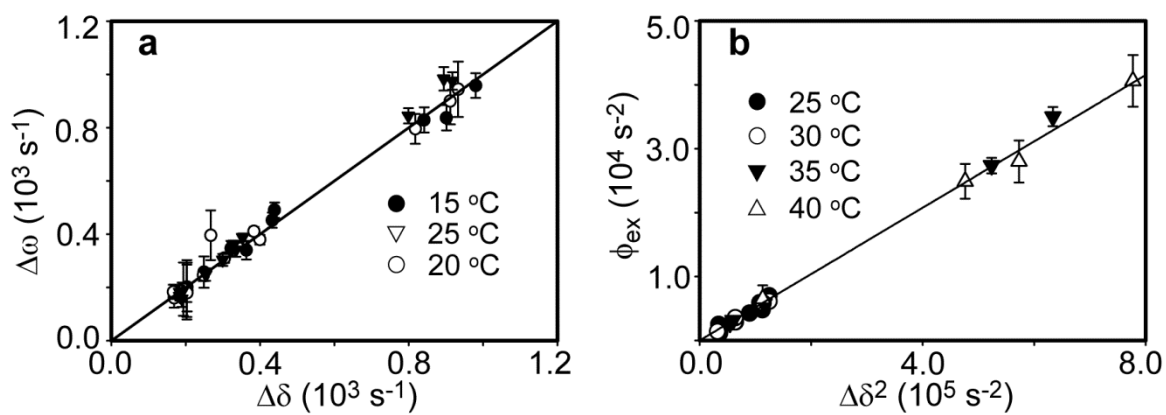

**Figure S4.** Correlation of  $\Delta\delta$  and (a)  $\Delta\omega$  or (b)  $\phi_{\text{ex}}$  at different temperatures. The diagonal line in (a) is shown to guide the eye and is not a regression curve. The line in (b) is a linear regression line.

Figure S5

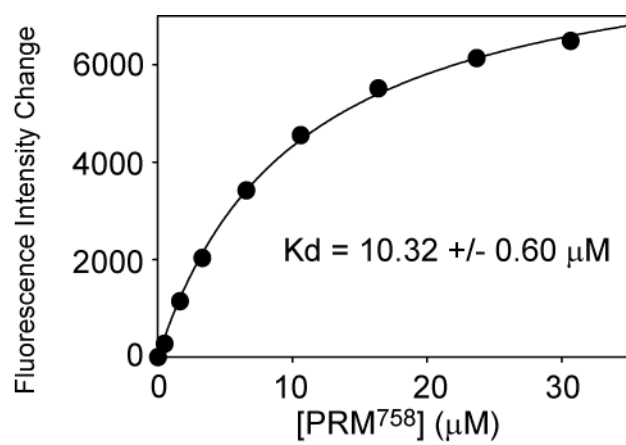

**Figure S5.** Fluorescence-probed binding isotherm between PRM<sup>758</sup> and the nSH3 domain in the presence of 1 M NaCl at 298 K.
